# Supplementary material for: A Novel Multicellular Placental Barrier Model to Investigate the Effect of Maternal Aflatoxin B1 Exposure on Fetal-Side Neural Stem Cells
Source: MDPI journal article supplement (doi:10.3390/toxins15050312), 2023-04-27
Supplement: s1 [file s1]

# Supplementary Materials: A Novel Multicellular Placental Barrier Model to Investigate the Effect of Maternal Aflatoxin B<sub>1</sub> Exposure on Fetal-Side Neural Stem Cells

Zhiwei Zhou, Dongmei Luo, Mengxue Li, Guangjie Lao, Zhiqiang Zhou, András Dinnyés, Wenming Xu and Qun Sun

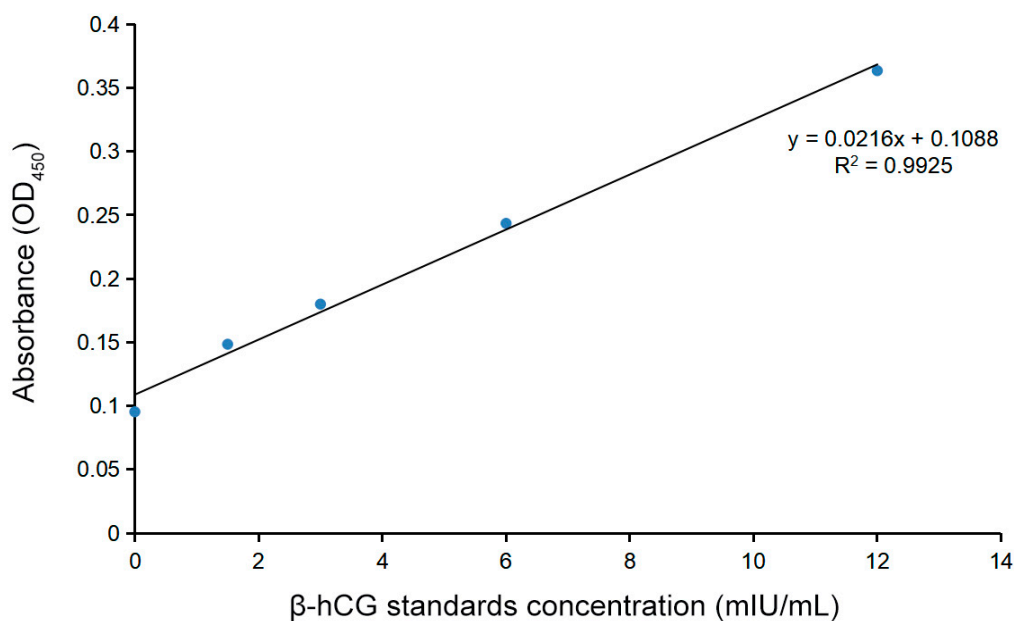

**Supplementary Figure S1.** The linear regression curve of the  $\beta$ -hCG standards.
